# Supplementary material
Source: publisher figshare collection journal article supplement (https://geolsoc.figshare.com/articles/dataset/_/3453953)
Supplement: Supplementary file 2 [file 1]

Major and trace analyses of georeferenced materials BCR-2 for the Ogaden Dyke Swarm samples

|              | BCR2          |      |            | MQR8          |      |
|--------------|---------------|------|------------|---------------|------|
|              | Average( N=4) | %RSD | rec. value | Average (N=4) | %RSD |
| SiO2 (wt. %) | 53,91         | 0,5  | 54,1       | 51,10         | 0,3  |
| TiO2         | 2,29          | 0,9  | 2,26       | 2,67          | 2,6  |
| Al2O3        | 13,40         | 0,4  | 13,5       | 14,07         | 0,7  |
| Fe2O3T       | 13,86         | 0,8  | 13,8       | 12,86         | 1,2  |
| MnO          | 0,198         | 1,2  |            | 0,182         | 1,4  |
| MgO          | 3,62          | 1,2  | 3,59       | 5,83          | 0,6  |
| CaO          | 7,12          | 0,8  | 7,12       | 9,87          | 0,8  |
| Na2O         | 3,13          | 1,0  | 3,16       | 2,48          | 0,6  |
| K2O          | 1,78          | 0,7  | 1,79       | 0,34          | 1,7  |
| P2O5         | 0,355         | 0,8  | 0,35       | 0,336         | 0,8  |
| Sc (ppm)     | 32,68         | 1,4  | 33,00      | 30,78         | 0,3  |
| V            | 411           | 0,5  | 416        | 369           | 0,8  |
| Cr           | 16,8          | 3,7  | 18,0       | 96,8          | 1,2  |
| Co           | 36,4          | 0,8  | 37,0       | 45,6          | 1,0  |
| Ni           | 12            | 4,5  | -          | 54            | 0,6  |
| Cu           | 19            | 1,1  | 19         | 41            | 0,6  |
| Zn           | 129           | 1,1  | 127        | 109           | 1,3  |
| Rb           | 47            | 0,6  | 48         | 6             | 0,6  |
| Sr           | 337           | 1,8  | 346        | 379           | 0,5  |
| Y            | 37,0          | 0,2  | 37,0       | 27,9          | 0,5  |
| Zr           | 193           | 1,8  | 188        | 160           | 2,3  |
| Nb           | 13            | 0,7  | -          | 17            | 1,3  |
| Cs           | 1,14          | 1,4  | 1,10       | 0,10          | 1,4  |
| Ba           | 674           | 2,5  | 683        | 197           | 0,3  |
| La           | 24,8          | 0,4  | 25,0       | 16,1          | 0,5  |
| Ce           | 52,6          | 0,3  | 53,0       | 37,3          | 0,2  |
| Pr           | 6,82          | 1,4  | 6,80       | 5,18          | 0,8  |
| Nd           | 28,6          | 1,5  | 28,0       | 22,8          | 1,2  |
| Sm           | 6,56          | 0,7  | 6,70       | 5,49          | 1,1  |
| Eu           | 1,93          | 1,0  | 2,00       | 1,88          | 1,3  |
| Gd           | 6,76          | 2,6  | 6,80       | 5,74          | 0,7  |
| Tb           | 1,05          | 1,6  | 1,07       | 0,89          | 0,4  |
| Dy           | 6,40          | 1,3  | -          | 5,18          | 1,6  |
| Ho           | 1,30          | 0,4  | 1,33       | 1,05          | 0,3  |
| Er           | 3,48          | 2,6  | -          | 2,70          | 1,8  |
| Yb           | 3,41          | 0,3  | 3,50       | 2,41          | 0,8  |
| Lu           | 0,51          | 0,0  | 0,51       | 0,36          | 0,4  |
| Hf           | 4,82          | 0,6  | 4,80       | 3,86          | 1,0  |
| Ta           | 0,78          | 0,3  | -          | 1,05          | 1,1  |
| Th           | 5,76          | 0,6  | 6,20       | 1,50          | 1,3  |
| U            | 1,67          | 1,5  | 1,69       | 0,50          | 1,0  |
