# Supplementary material
Source: publisher figshare collection journal article supplement (https://geolsoc.figshare.com/articles/dataset/_/3453953)
Supplement: Supplementary file 3 [file 1]

## Petrographic description of representative samples of Ogaden dyke swarm

All pictures are from optic microscopy. Upper: polarized light; lower: polarized light, crossed nicols.

MQR-8

200  $\mu$

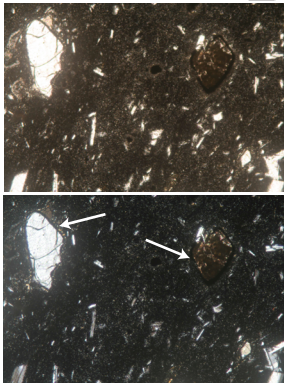

Microporphyritic texture with microlites of plagioclase and abundant euhedral oxide and intersertal clinopyroxene. Numerous xenocrysts of quartz with clinopyroxene reaction rims and phantoms of amphiboles xenocrysts highly altered and destabilized in oxide (left arrow in lower left picture: quartz, right arrow: amphibole phantom).

MQR-9

200  $\mu$

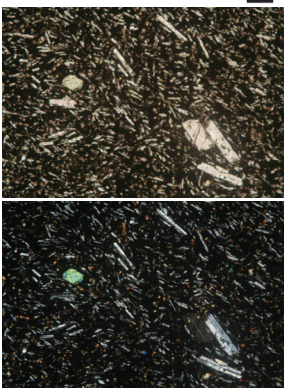

Microlitic texture with microphenocrysts of plagioclase and clinopyroxene, microlites of plagioclase, and dendritic oxides.

MAO-3

200  $\mu$

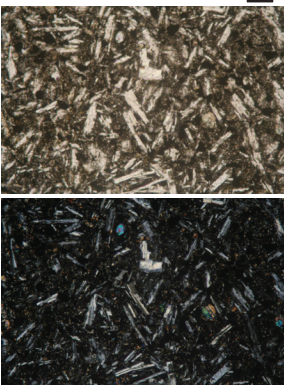

Microlitic texture with plagioclase microlites, intersertal clinopyroxenes, dendritic oxides, and olivines. Olivine locally displays minor alteration in serpentine minerals. Few quartz grains with pyroxene reaction rims.

42.1

200  $\mu$

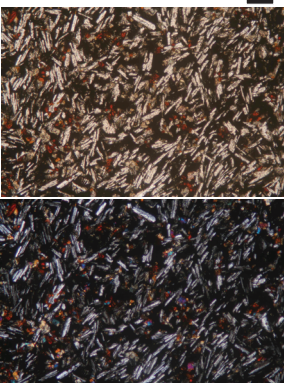

Microlitic texture with plagioclase microlites and acicular oxide, partially altered intersertal clinopyroxene (red-brown color upper left picture). Corroded quartz grains with pyroxene reaction rims.

41a

200  $\mu$

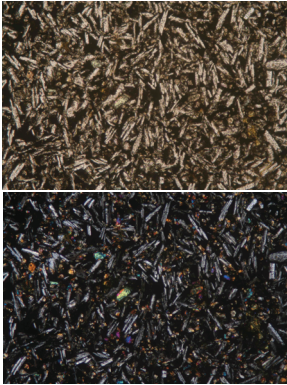

Microlitic texture with plagioclase microliths and acicular oxide, interstitial clinopyroxene and oxides weakly altered.

11b

200  $\mu$

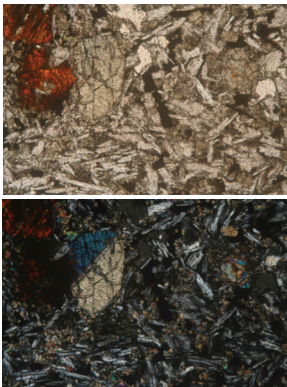

Microlitic texture with plagioclase microlite, intersertial clinopyroxene and oxide, microphenocrysts of partially altered clinopyroxene (red-brown color in upper left figure).

4

200  $\mu$

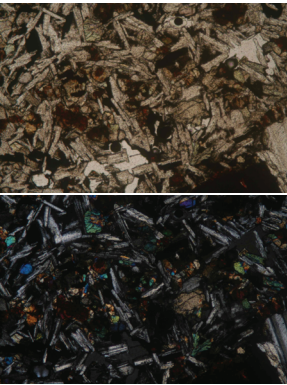

Microlitic texture with plagioclase microlite, partially altered intersertial clinopyroxene (red-brown color in upper left figure), microphenocrysts of opaque and clinopyroxenes.
